# Supplementary material
Source: PubMed Central journal article supplement (PMC2890285)
Supplement: NIHMS211390-supplement-Supplementary_data.pdf [file NIHMS211390-supplement-Supplementary_data.pdf]

**Supplemental Figure 1. Kinetics of ENDM1 and ENDM2 expression on ES cell-derived populations.**

ES cells were differentiated in endoderm, mesoderm, or ectoderm inducing conditions for different times and analyzed by flow cytometry for CD25-Foxa3 and either (A) ENDM1 or (B) ENDM2.

**Supplemental Figure 2. Characterization of ES cell-derived ENDM1<sup>-</sup> and ENDM2<sup>-</sup> cells.**

ES cells were differentiated towards endoderm, sorted, and placed in hepatocyte inducing conditions as described in Figure 3. (A) Intracellular flow cytometry measuring the proportion of CD4-Foxa2<sup>+</sup> and albumin expressing cells in the CD4<sup>+</sup>CD25<sup>-</sup>, ENDM1<sup>-</sup> and ENDM2<sup>-</sup>-derived populations shown in Figure 3A. (B) Intracellular flow cytometry measuring the proportion of CD4-Foxa2<sup>+</sup> and Afp expressing cells in the CD4<sup>+</sup>CD25<sup>-</sup>, ENDM1<sup>-</sup> and ENDM2<sup>-</sup>-derived populations shown in Figure 3A.

**Supplemental Figure 3. Analysis of endoderm specific monoclonal antibodies on the ES line F1(v6.5).**

Staining patterns of ENDM1 and ENDM2 on the ES cell line F1(v6.5) differentiated in endoderm, mesoderm, or ectoderm inducing conditions for 6 days. Histograms of staining analyzed by flow cytometry are shown.

**Supplemental Figure 4. Expression of ENDM1 and ENDM2 on embryonic and extra-embryonic tissue of the mouse embryo.**

Day 8.25 Mouse embryos were dissected into embryonic or extra-embryonic regions, dissociated and analyzed by flow cytometry for ENDM1, ENDM2, EpCAM and CXCR4. (A) Expression of EpCAM versus ENDM1 or ENDM2 on SSC<sup>high</sup> (granular) or SSC<sup>low</sup> (non-granular) extra-embryonic cells. (B) CXCR4 versus ENDM1 or ENDM2 on embryonic cells and on SSC<sup>high</sup> (granular) extra-embryonic endoderm.

**Supplemental Table 1. Oligonucleotide sequences of real time PCR primers.**

Supplemental Figure 1A

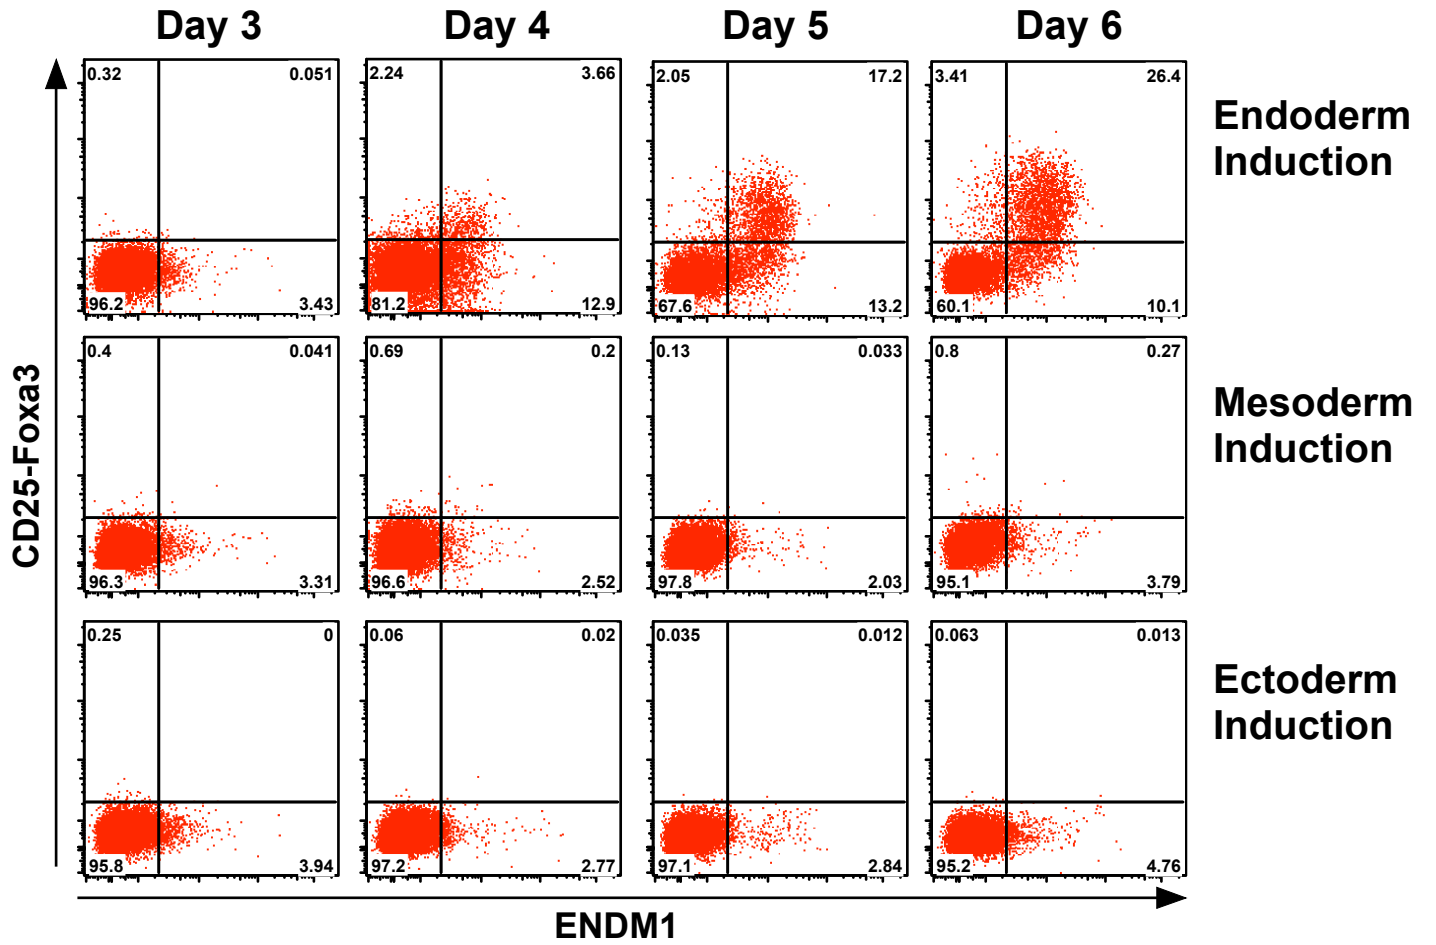

Supplemental Figure 1B

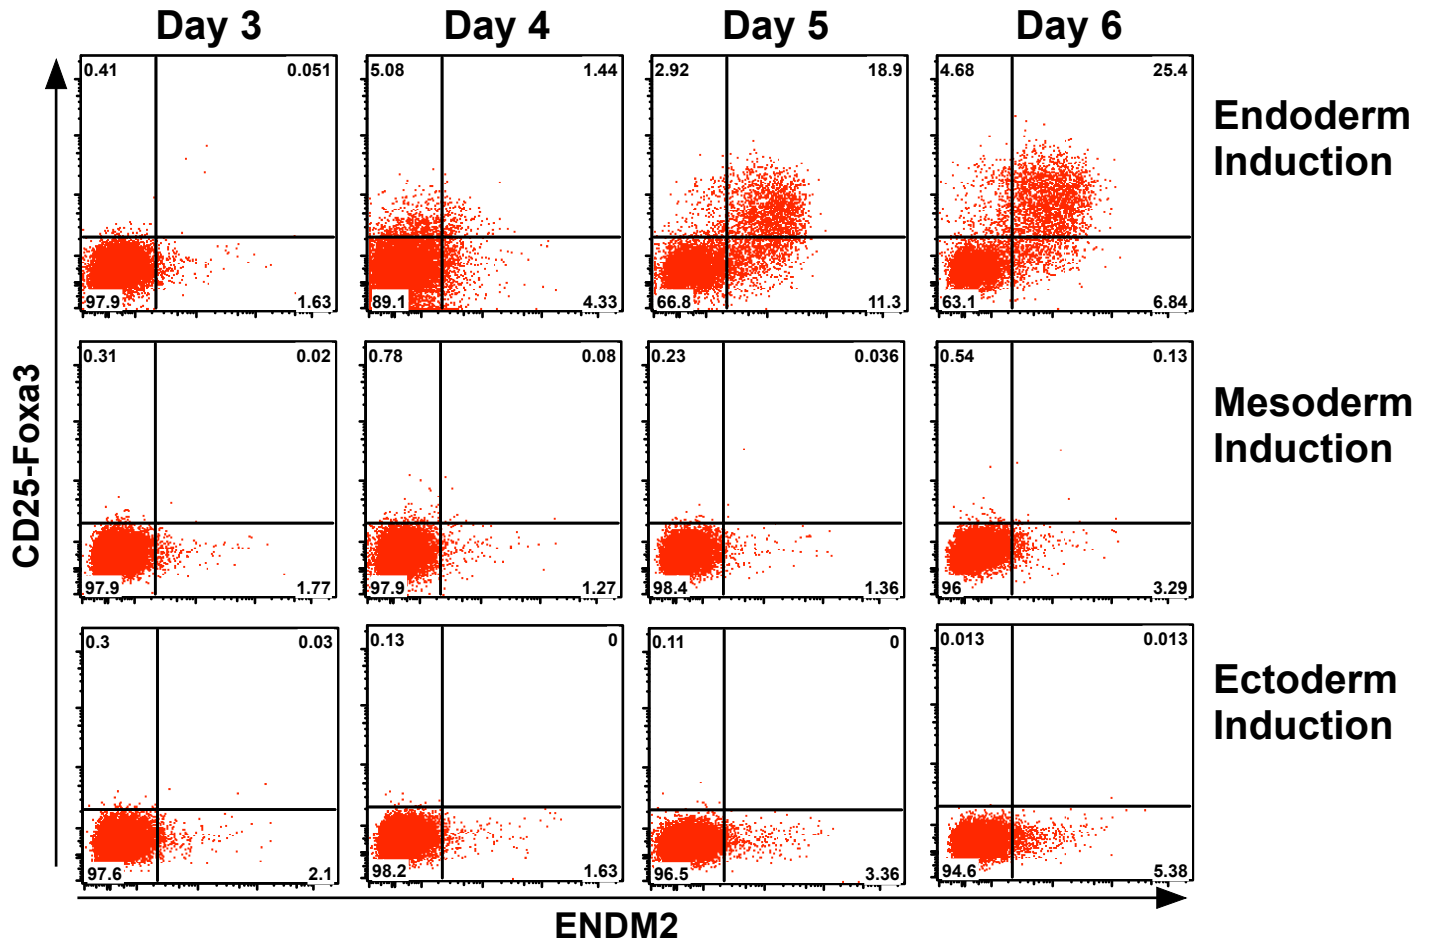

# Supplemental Figure 2

**A**

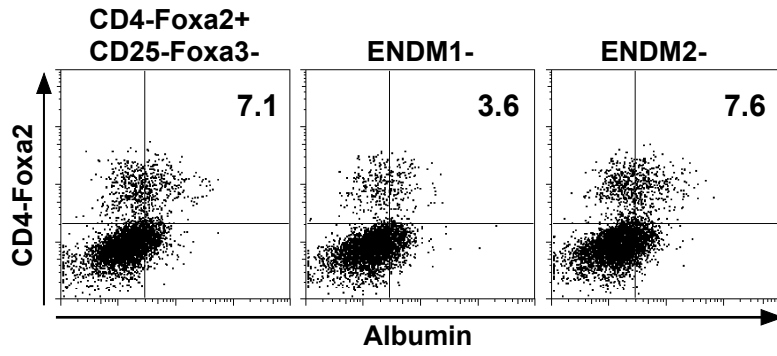

**B**

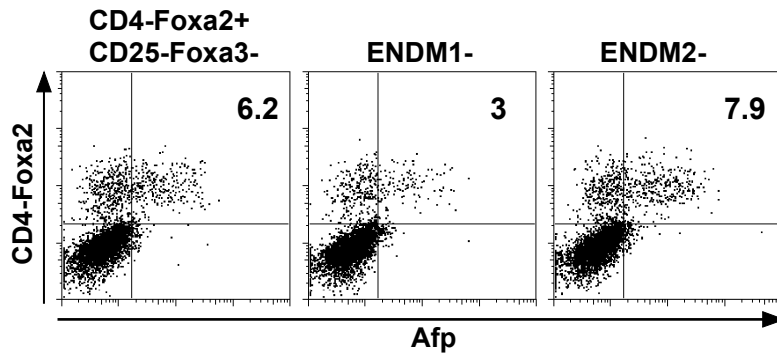

### Supplemental Figure 3

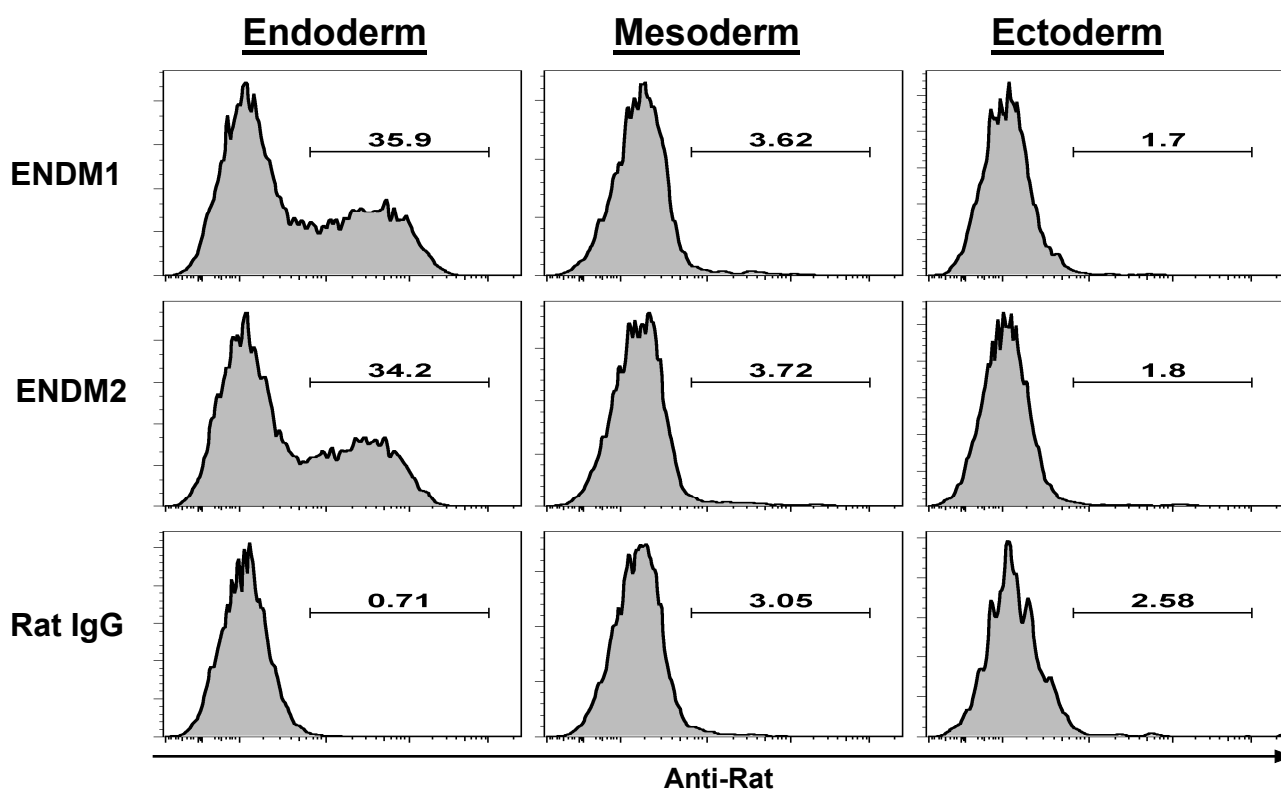

# Supplemental Figure 4

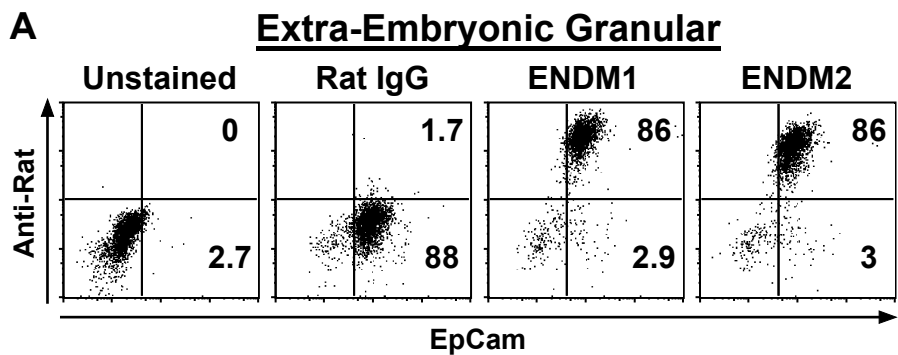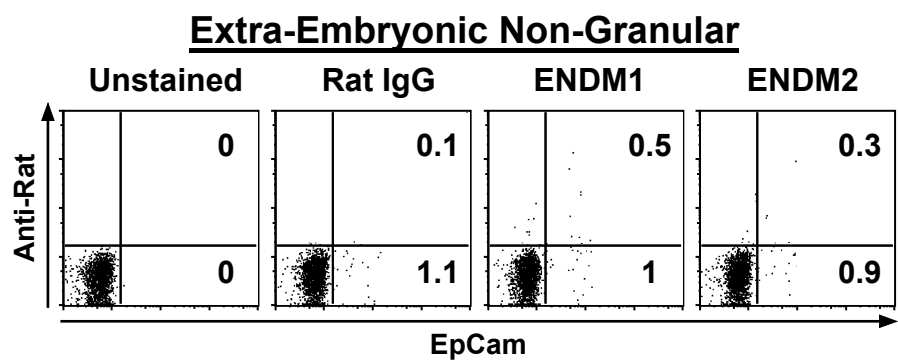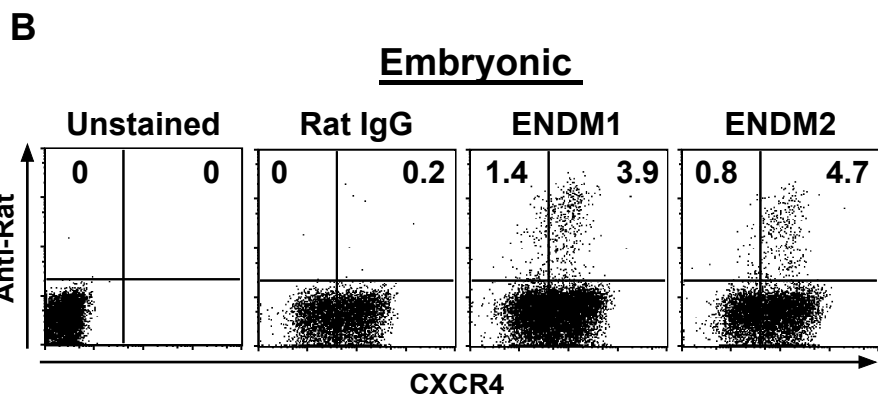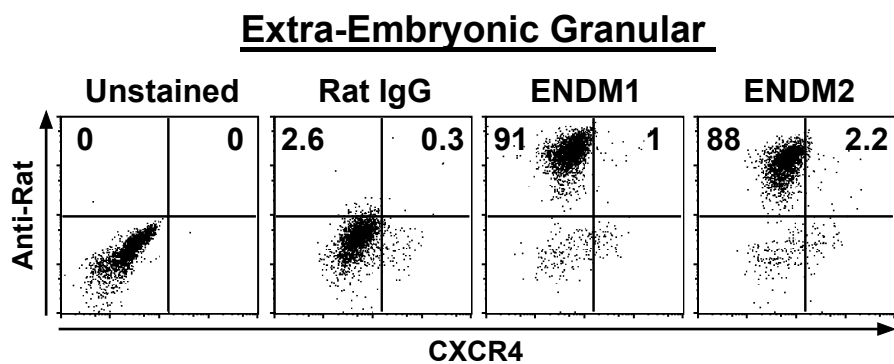

**Supplemental Table 1**

| <b>Gene</b>  | <b>Forward</b>                        | <b>Reverse</b>                     |
|--------------|---------------------------------------|------------------------------------|
| <b>Afp</b>   | GGA ATG AAG CAA GCC CTG TGA ACT       | AAC TGG TGA TGC ATA GCC TCC TGT    |
| <b>Amn</b>   | GGG TTT CCG AAA TCC GAT               | CGA ACT TGG TAT CAA TGT CCA        |
| <b>Apoc2</b> | CCA TGA GCA CTT ACG CAG GCA TTT       | CGC GGT GTC TGT CAT CAG GTT T      |
| <b>Cdx1</b>  | GCC AAG GAG CGC AAA GTA AAC AAG AAG   | AGG CCA GCA TTA GTA GGG CAT AGA    |
| <b>Cubn</b>  | AAT GTG GAG TAG CTG AAT CGG GAG AG    | TTT GAT GGC GTG GGC AGA GAT G      |
| <b>Foxa1</b> | TGT TAG GCC CAC CAC ACG AGT TTA       | GGT GAA AGC AAA GGG CTC CAA TGT    |
| <b>Foxa3</b> | GGA ACA TGT TTG AGA ACG GCT           | CGA TGT GGC GCT GTT TCC TTT        |
| <b>Foxc1</b> | ATT CCC GGC ACT CTT AGA GCC AAA       | AGA TTC TGT TCG CTG GTG TGA GGA    |
| <b>Foxg1</b> | CGC CAG CAG CAC TTT GAG TTA CA        | GG TTG TTG CCC AGC GAG TTT         |
| <b>HNF4a</b> | AAC CAC GCT ACT TGC CTT TGC T         | TCT GAT GGG ACA CAG CCT ACT TCT    |
| <b>HNF6</b>  | TTA CAG CAT CCC ACA GGC CAT CTT       | TCT CCC GAC CCG ACT TGA GTT T      |
| <b>Meox1</b> | AGC GTC TTG TGT TCT CCA AGG           | ATG TGT GTG AAC CTG GGA GGT        |
| <b>Otx2</b>  | GCA GCA GAA TGG AGG TCA GAA CAA AG    | AAT GGT TGG GAC TGA GGT ACT AGA GG |
| <b>Pax6</b>  | GTG GAC ACA GCA GTT GGG TAT TCA       | GAT ACC GTG CCT TCT GTA CGC AAA    |
| <b>Pyx</b>   | CTT GCA TGT TTG GTT TAA GAA GAG GGC A | AGG GAC AGG GAA ATG AAC ACA CAC    |
| <b>Sox17</b> | TGT AAA GGT GAA AGG CGA GGT           | GCA TCT TGC TTA GCT CTG CGT        |
| <b>Sox7</b>  | AAT GAA TGA CTG CCC AAG GAC CCA       | ACC ATC TTG CCA GAC CAA AGG TGA    |
| <b>Tbx1</b>  | CCA TGT TGT CTA TGT GGA CCC TCG AAA   | GCA GTG AAG CGT GTC TCC TCA AAC    |
| <b>Tdh</b>   | GAG TTC CTT TAC ACA CTG CCT TTG TCC   | GCC ACC ACC ACT CAG GAC TTC ATT T  |
